# Supplementary material for: The crystal structure of the Leishmania infantum Silent Information Regulator 2 related protein 1: Implications to protein function and drug design
Source: PubMed Central journal article supplement (PMC5854310; doi:10.1371/journal.pone.0193602), 2018-03-15
Supplement: pone.0193602.s006.pdf [file pone.0193602.s006.pdf]

| Organism                            | UNIPROT    | sirtuin | aa's | Da    | pI   | Pro | Ser | Thr | Sequence of the $\beta 8$ - $\beta 9$ connector region *                                                 |
|-------------------------------------|------------|---------|------|-------|------|-----|-----|-----|----------------------------------------------------------------------------------------------------------|
| <b>Leishmania</b>                   |            |         |      |       |      |     |     |     |                                                                                                          |
| <i>Leishmania infantum</i>          | Q8I6E4     | SIR2rp1 | 84   | 9014  | 4.4  | 7   | 16  | 3   | RVGGLLFRFPDDPLNTVHEDAVAKEGRSSSSQSRSPSASPRREEGGTEDSPSSP<br>NEE VEEASTSSSSDGYGQYGDYHAHPDVCR                |
| <i>Leishmania major</i>             | Q25337     | SIR2rp1 | 84   | 8961  | 4.2  | 5   | 16  | 3   | RVGGLLFRFPDDPLDTHDDAVAKEGRSSSSQSRSPSASARREEGGTEDGSSSP<br>NEEVEDASTSSSSDGYGQYGDYHAHPDVCR                  |
| <i>Leishmania amazonensis</i>       | Q8IT90     | SIR2rp1 | 84   | 8819  | 4.8  | 5   | 15  | 2   | RVGGLLFRFPDDPLNTVHDDAVAKEGQSSSSQSRSPSASARCEKGGVEDRSSS<br>PKEGGDEASTSGSSDGYGQYGDYHAHPDLCR                 |
| <b>Leptomonas</b>                   |            |         |      |       |      |     |     |     |                                                                                                          |
| <i>Leptomonas pyrrocoris</i>        | A0A0N0VI28 | SIR2rp1 | 103  | 10389 | 3.9  | 6   | 21  | 3   | RVGGSFFRFPDDDDVPSAEGLAATSSAASSSSSRLLAGDGVGADSGDGHRS<br>AAASTAPESIAATRESNEEGREEDAASSSSSSDGYAQYGDYDVHPPLCR |
| <i>Leptomonas seymouri</i>          | A0A0N1HVQ5 | SIR2**  | 93   | 9562  | 3.9  | 9   | 14  | 4   | RVGGNLFRRFPDDELPMFMDAVGATGAPSSPPQPPEAAGSADGHSSATGSTP<br>QQCTAGLLEGDVEEREVSSSSSSDGYAQYGEYSAHPDLR          |
| <b>Phytomonas</b>                   |            |         |      |       |      |     |     |     |                                                                                                          |
| <i>Phytomonas sp. isolate Hart1</i> | W6L9Z1     | SIR2**  | 102  | 10835 | 4.2  | 3   | 13  | 3   | IFNLERVGGRMFYLPEDVMDEKKASGREDDSSASSAAATHAEDDGIAMNGNA<br>AATLHGNCDFDRNALEEPLLGEVASDSSSSSEGFITEHEEALLRPVCR |
| <b>Trypanosoma</b>                  |            |         |      |       |      |     |     |     |                                                                                                          |
| <i>Trypanosoma brucei brucei</i>    | Q57V41     | SIR2rp1 | 63   | 6825  | 9.5  | 2   | 11  | 5   | RVGGRMFRFPDTRTPNFRASSYRLSTGNGNGSKISSGDSSNSSSSVDGYDQFTL<br>AENDETVLR                                      |
| <i>Trypanosoma cruzi</i>            | Q4DP02     | SIR2**  | 60   | 6214  | 7.4  | 2   | 17  | 3   | RVGGAMFRFPDTEPTLNSFSRNHTGNSHSSSSNSSSSSSSSSDGYSQFANHAA<br>DAGGICR                                         |
| <b>Non kinetoplastids</b>           |            |         |      |       |      |     |     |     |                                                                                                          |
| <i>Plasmodium falciparum</i>        | Q8IE47     | SIR2A   |      |       |      |     |     |     | Region not observed                                                                                      |
| <i>Toxoplasma gondii</i>            | B9PMV3     | SIR2    | 9    | 962   | 11.0 | 0   | 1   | 3   | TTGLTNRIS                                                                                                |
| <i>Entamoeba histolytica</i>        | M3S670     | SIR2**  | 13   | 1515  | 9.7  | 0   | 0   | 0   | KVGKMMCYDNLGR                                                                                            |
| <i>Schistosoma mansoni</i>          | T1VXA1     | SIRT2   | 36   | 4210  | 10.2 | 0   | 5   | 1   | YNDGSTESGLSSFIMRFMVAGFKQNYMKWGRSDNKR                                                                     |
| <i>Drosophila melanogaster</i>      | Q9VK34     | SIR2    |      | 1751  | 5.1  | 0   | 1   | 0   | QLHHLKFDVELLGD                                                                                           |
| <i>Saccharomyces cerevisiae</i>     | P06700     | SIR2    | 7    | 827   | 7.8  | 1   | 0   | 0   | PVKHAEF                                                                                                  |
| <i>Saccharomyces cerevisiae</i>     | P53686     | Hst2    | 12   | 1334  | 10.6 | 1   | 0   | 2   | TVGDFKANKRPT                                                                                             |
| <i>Homo sapiens</i>                 | Q96EB6     | SIRT1   | 7    | 860   | 8.0  | 2   | 0   | 0   | PLPHLHF                                                                                                  |
| <i>Homo sapiens</i>                 | Q8IXJ6     | SIRT2   | 28   | 2979  | 9.6  | 1   | 2   | 0   | KAGQSDPFLGMIMGLGGGMDFDSSKAYR                                                                             |
| <i>Homo sapiens</i>                 | Q9NTG7     | SIRT3   | 12   | 1389  | 12.4 | 2   | 1   | 0   | LVGPLAWHPRSR                                                                                             |

\* The connector region between  $\beta 8$  and  $\beta 9$  strands is defined by reference to conserved flanking amino acids Glu250 and Asp263 of ScHst2 via multiple sequence alignments (e.g. equivalent to Glu243 and Asp328 in LiSIR2rp1). \*\* hypothetical sir2rp1 homologs of ScHst2/hSIRT2.
