# Supplementary material for: The crystal structure of the Leishmania infantum Silent Information Regulator 2 related protein 1: Implications to protein function and drug design
Source: PubMed Central journal article supplement (PMC5854310; doi:10.1371/journal.pone.0193602), 2018-03-15
Supplement: pone.0193602.s007.pdf [file pone.0193602.s007.pdf]

| Deletion mutant    | Primer | Sequence                                            |
|--------------------|--------|-----------------------------------------------------|
| All                | 1      | 5' CGAATTCCATATGACAGCGTCTCCGAGAGCGCCACAT 3'         |
|                    | 2      | 5' CAAGCTTGGATCCTCACGTCTCATTCGGCGCCCTCTG 3'         |
| $\Delta$ P253-E303 | 3      | 5' GGCGGCCTCCTCTTCCGCTTTGCGTCGACGTCCAGCTCGAGC 3'    |
|                    | 4      | 5' GCTCGAGCTGGACGTGACGCAAAGCGGAAGAGGAGGCCGCC 3'     |
| $\Delta$ P253-H322 | 5      | 5' GGCGGCCTCCTCTTCCGCTTTCCCGATGTCTGCCGGGATGTT 3'    |
|                    | 6      | 5' AACATCCCGGCAGACATCGGGAAAGCGGAAGAGGAGGCCGCC 3'    |
| $\Delta$ S272-S310 | 7      | 5' GTTGCCAAGGAGGGACGCTCGGACGGCTACGGGCAGTACGGTGAC 3' |
|                    | 8      | 5' GTCACCGTACTGCCCGTAGCCGTCCGAGCGTCCCTCCTTGGCAAC 3' |
| $\Delta$ S272-H322 | 9      | 5' GTTGCCAAGGAGGGACGCTCGCCGATGTCTGCCGGGATGTT 3'     |
|                    | 10     | 5' AACATCCCGGCAGACATCGGGCGAGCGTCCCTCCTTGGCAAC 3'    |
