# Supplementary material for: The crystal structure of the Leishmania infantum Silent Information Regulator 2 related protein 1: Implications to protein function and drug design
Source: PubMed Central journal article supplement (PMC5854310; doi:10.1371/journal.pone.0193602), 2018-03-15
Supplement: pone.0193602.s008.pdf [file pone.0193602.s008.pdf]

| <b>Primer</b> | <b>Sequence</b>                      |
|---------------|--------------------------------------|
| 1             | 5' <u>CGTCTAGA</u> ATGACAGCGTCTCC 3' |
| 2             | 5' <u>CGCATATG</u> TCACGTCTCATTCG 3' |
| 3             | 5' GCGAGAAGCCAGAGATAT 3'             |
| 4             | 5' TGCAACAGTCGGATGAAG 3'             |
| 5             | 5' TCTTCACTGGTGTCAATG 3'             |
| 6             | 5' GACGATACAAGTCAGGTT 3'             |
| 7             | 5' CGCATACACTATTCTCAGA 3'            |
| 8             | 5' TCGTTGTCAGAAGTAAGTT 3'            |
| 9             | 5' AACGACCCCTCAATAC 3'               |
| 10            | 5' CCTACCATGCCTTCTA 3'               |
