# Supplementary material for: The crystal structure of the Leishmania infantum Silent Information Regulator 2 related protein 1: Implications to protein function and drug design
Source: PubMed Central journal article supplement (PMC5854310; doi:10.1371/journal.pone.0193602), 2018-03-15
Supplement: pone.0193602.s009.pdf [file pone.0193602.s009.pdf]

## 1. Sample description

### 1.1. SIR2RP1 protein

```
      10          20          30          40          50          60
MARGSHHHHH HLEMTASPRA PHQEHLVLP TLEGLAHYIR EKNVRRILVL VGAGASVAAG

      70          80          90          100         110         120
IPDFRSPDTG IYANLGKYNL EDPTDAFSLT LLREKPEIFY SIARELNLWP GHFQPTAVHH

      130         140         150         160         170         180
FIRLLQDEGR LLRCCTQNID GLEKAAGVSP ELLVEAHGSF AAAACIECHT PFSIEQNYLE

      190         200         210         220         230         240
AMSGTVSRCS TCGGIVKPNV VFFGENLPDA FFDALHHDAP IAELV I IIGT SMQVHPFALL

      250         260         270         280         290         300
PCVVPKSVPR VVMNRERVGG LLFRFPDDPL NTVHEDAVAK EGRSSSSQSR SPSASPRREE

      310         320         330         340         350         360
GGTEDSPSSP NEEVEEASTS SSSDGYGYG DYHAHPDVCR DVLFRGDCQE NVVTLAEYLG

      370         380
LSEALAKRMR LSDAAPATAQ RAPNET
```

Molecular weight = 42112.13

Residues = 386

Isoelectric Point = 5.7

Extinction Coefficient = 17210

## 2. Experimental section

### 2.1. LC-UV/MS

HPLC system: Alliance 2695 (Waters)

UV detector: PDA 2996 (Waters)

|                       |                                                   |
|-----------------------|---------------------------------------------------|
| Column                | XBRIDGE BEH300 C4 3.5 $\mu$ m (2.1 $\times$ 50mm) |
| Column temperature    | 50°C                                              |
| Flow rate             | 0.2 ml/min                                        |
| Gradient              | 5% to 90% B in 30 min                             |
| Mobile phase A        | 0.05% TFA/0.1% FA/Water                           |
| Mobile phase B        | 0.045% TFA/0.1% FA/70% ACN/30% iPrOH              |
| Diode Array Detection | 200-400 nm                                        |

HPLC system was coupled to ESI-TOF mass spectrometer (LCT, Waters) equipped with the Triversa Nanomate (Advion) microfluidic nano-ESI device. Mass spectrometer was operated in the positive ion mode in the mass range  $m/z$  500-5000.

## 2.2. Peptide assignment

BioLynx was used to assign the protein cleavage products detected by LC-UV/MS. Search criteria included trypsin digestion specificity, mass tolerance was set at 0.6 Da for peptides smaller than 10kDa, and at 1 Da for large protein products (> 20kDa).

## 3. Results

LC-UV analysis of SIR2RP1 submitted to limited trypsin digestion provided LC profile depicted in figure 1. Two very low intensity peaks (①) eluted first from the BEH column (8.99 and 9.53 min). Two major peaks, ② and ③, eluted at 14.84 min and 20.29 min, respectively.

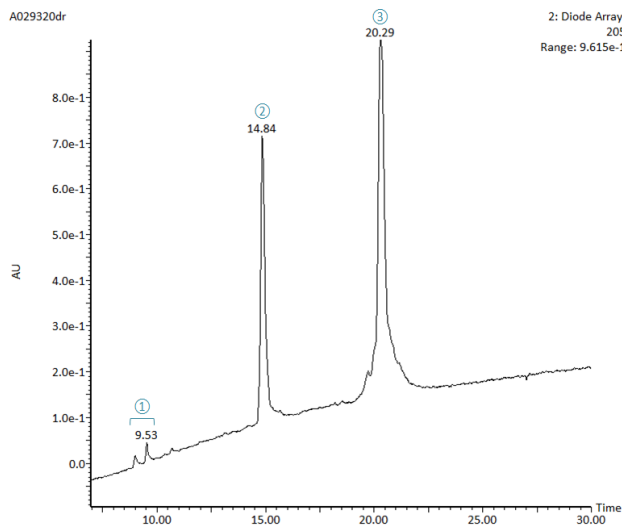

Figure 1: LC elution profile of SIR2RP1 sample following limited trypsin proteolysis.

MS analysis revealed a number of species eluting in the UV-detected peaks:

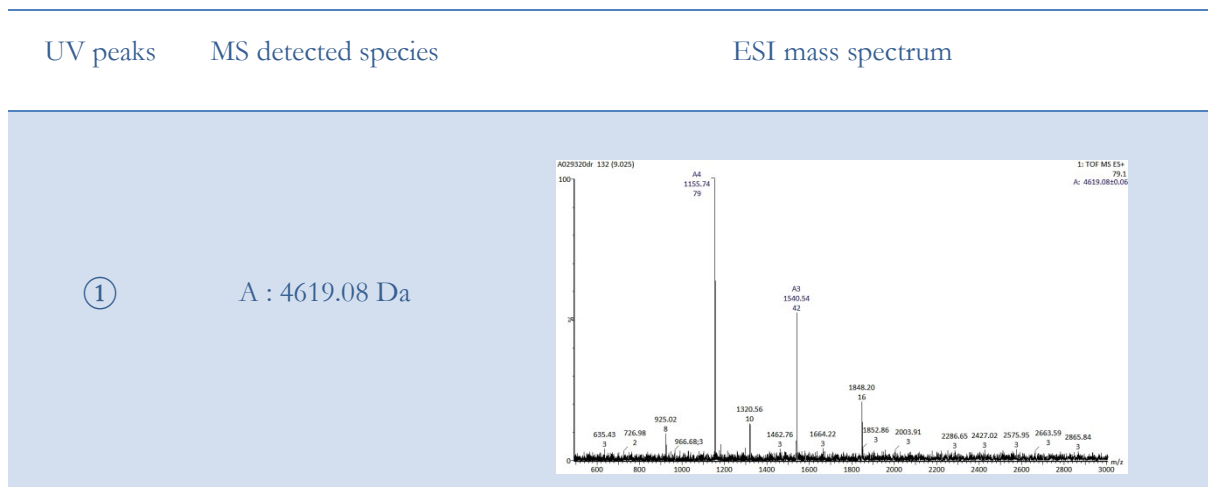

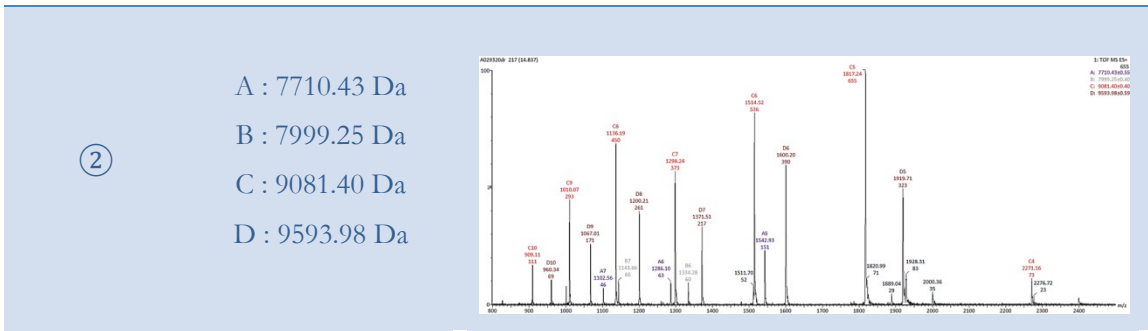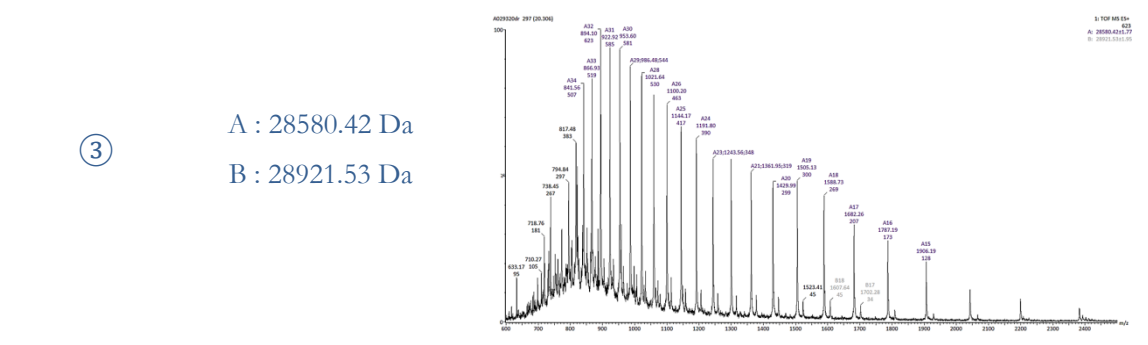

Peptide assignment was performed as described in the experimental section unless specified otherwise in the table below.

Peak ①

Species "A" : 4619.08 Da

| Hit # | Res#    | Mass    | Sequence                                                                                 | C-Term | Total Mass | Dev  | S-S |
|-------|---------|---------|------------------------------------------------------------------------------------------|--------|------------|------|-----|
| 1     | 298-340 | 4619.61 | (R) REGGTRDSDSPSPNEEV<br>EASATSSSDGTYGQYDHYA<br>HPDVCRLFRGDCQENVVT<br>LAEYLGLSEALAKR (D) | -OH    | 4619.61    | 0.53 | -   |

Peak ②

Species "A" : 7710.43 Da

First peptide mass search with done with a mass tolerance of 0.6 Da and trypsin specificity provided no results. Mass tolerance was then increased to 2 Da while keeping trypsin digestion specificity. With these search criteria, a single peptide hit was found but would assume one disulfide bridge to explain the unusually large mass error (1.71 Da).

| Hit # | Res#    | Mass    | Sequence                                                                                 | C-Term | Total Mass | Dev  | S-S |
|-------|---------|---------|------------------------------------------------------------------------------------------|--------|------------|------|-----|
| 3     | 298-368 | 7712.14 | (R) REGGTRDSDSPSPNEEV<br>EASATSSSDGTYGQYDHYA<br>HPDVCRLFRGDCQENVVT<br>LAEYLGLSEALAKR (H) | -OH    | 7712.14    | 1.71 | -   |

Species "B" : 7999.25 Da

| Hit # | Res#    | Mass    | Sequence                                                                                 | C-Term | Total Mass | Dev  | S-S |
|-------|---------|---------|------------------------------------------------------------------------------------------|--------|------------|------|-----|
| 1     | 298-370 | 7999.52 | (R) REGGTRDSDSPSPNEEV<br>EASATSSSDGTYGQYDHYA<br>HPDVCRLFRGDCQENVVT<br>LAEYLGLSEALAKR (L) | -OH    | 7999.52    | 0.27 | -   |

Peak ②

Species "C" : 9081.40 Da

Mass tolerance: 0.60  
Number of hits = 2  
Hit# Res# Mass Sequence  
\* 2 298-381 9081.71 (R)REKGGTEDEPSPFNNEV  
EEAFTSSSSDGYQGDYHA  
HFDVCRDVLFRGDCQENVVF  
LAETLGLSEALAGNRLSDA  
APATAQR(A)

C-Term -OH  
Total Mass 9081.71  
Dev 0.31  
S-S -

1 MARGS HHHH HLEMT ASPRA FQEH VLGEF TLEGL AHYIR  
41 EKQVR RILVL VGAGA SVAAG IDQFR SFGTG IYANL GKYNL  
81 EDPTD AFSLT LREK PEIFY STARE LNLMF GHPQF TAVNH  
121 FIRLL QDEGR LREK TQNIID GLEKA AGVSP ELIWE AHGSP  
161 AAAAC IECIT PFSIE QNYLE AMSGT VSRCS TCGGI VKPNV  
201 VFFGE NLFDA FFDAL HHDAP IAEVL IITGT SMQVH PFALL  
241 PCVVF KSVPR VVNHK ERVGG LLFRF DDQPL NVVHE DAVAK  
281 EGRSS SGRSR SPSAS FRRSE GDTED SPSSE NEEVE EASTS  
321 SSSDG YQGYG DYHAM DVQCR DVLFK GDCQE NVVTL AYLIG  
361 LREAL AKRMR LQDAA PATAQ RAINE T

Species "D" : 9593.98 Da

Mass tolerance: 0.60  
Number of hits = 1  
Hit# Res# Mass Sequence  
\* 1 298-386 9594.23 (R)REKGGTEDEPSPFNNEV  
EEAFTSSSSDGYQGDYHA  
HFDVCRDVLFRGDCQENVVF  
LAETLGLSEALAGNRLSDA  
APATAQR(A)

C-Term -OH  
Total Mass 9594.23  
Dev 0.25  
S-S -

1 MARGS HHHH HLEMT ASPRA FQEH VLGEF TLEGL AHYIR  
41 EKQVR RILVL VGAGA SVAAG IDQFR SFGTG IYANL GKYNL  
81 EDPTD AFSLT LREK PEIFY STARE LNLMF GHPQF TAVNH  
121 FIRLL QDEGR LREK TQNIID GLEKA AGVSP ELIWE AHGSP  
161 AAAAC IECIT PFSIE QNYLE AMSGT VSRCS TCGGI VKPNV  
201 VFFGE NLFDA FFDAL HHDAP IAEVL IITGT SMQVH PFALL  
241 PCVVF KSVPR VVNHK ERVGG LLFRF DDQPL NVVHE DAVAK  
281 EGRSS SGRSR SPSAS FRRSE GDTED SPSSE NEEVE EASTS  
321 SSSDG YQGYG DYHAM DVQCR DVLFK GDCQE NVVTL AYLIG  
361 LREAL AKRMR LQDAA PATAQ RAINE T

Peak ③

Species "A" : 28580.43 Da

Mass tolerance: 1.00  
Number of hits = 1  
Hit# Res# Mass Sequence  
\* 1 20-280 28579.86 (R)APQHEVLRGPTLEGIA  
HYIREQNRRLIVLVGAS  
VVAAGIDPFRSFGTGYANLG  
KYNLEDPTDFAFSLTLREKQ  
EIFYSIARELNLMGHPQPT  
AVHHPTRLLGQGRLLKCCP  
QNIIDGKAGVSEFELIWEA  
HSPAAACIECITPFSIEQ  
NYLEAMGTVSRCSFCGGIV  
KRVVFFGKMLGDAFFLAH  
RDAPIAELVIIIGTSMQVH  
FALLPCVVKSVPRVVMNRE  
RVGGLLEFFFGDPLNVVHE  
AVAK(E)

C-Term -OH  
Total Mass 28579.86  
Dev -0.57  
S-S -

1 MARGS HHHH HLEMT ASPRA FQEH VLGEF TLEGL AHYIR  
41 EKQVR RILVL VGAGA SVAAG IDQFR SFGTG IYANL GKYNL  
81 EDPTD AFSLT LREK PEIFY STARE LNLMF GHPQF TAVNH  
121 FIRLL QDEGR LREK TQNIID GLEKA AGVSP ELIWE AHGSP  
161 AAAAC IECIT PFSIE QNYLE AMSGT VSRCS TCGGI VKPNV  
201 VFFGE NLFDA FFDAL HHDAP IAEVL IITGT SMQVH PFALL  
241 PCVVF KSVPR VVNHK ERVGG LLFRF DDQPL NVVHE DAVAK  
281 EGRSS SGRSR SPSAS FRRSE GDTED SPSSE NEEVE EASTS  
321 SSSDG YQGYG DYHAM DVQCR DVLFK GDCQE NVVTL AYLIG  
361 LREAL AKRMR LQDAA PATAQ RAINE T

Species "B" : 28921.53 Da

Mass tolerance: 1.00  
Number of hits = 1  
Hit# Res# Mass Sequence  
\* 1 20-283 28922.21 (R)APQHEVLRGPTLEGIA  
HYIREQNRRLIVLVGAS  
VVAAGIDPFRSFGTGYANLG  
KYNLEDPTDFAFSLTLREKQ  
EIFYSIARELNLMGHPQPT  
AVHHPTRLLGQGRLLKCCP  
QNIIDGKAGVSEFELIWEA  
HSPAAACIECITPFSIEQ  
NYLEAMGTVSRCSFCGGIV  
KRVVFFGKMLGDAFFLAH  
RDAPIAELVIIIGTSMQVH  
FALLPCVVKSVPRVVMNRE  
RVGGLLEFFFGDPLNVVHE  
AVAKGR(S)

C-Term -OH  
Total Mass 28922.21  
Dev 0.68  
S-S -

1 MARGS HHHH HLEMT ASPRA FQEH VLGEF TLEGL AHYIR  
41 EKQVR RILVL VGAGA SVAAG IDQFR SFGTG IYANL GKYNL  
81 EDPTD AFSLT LREK PEIFY STARE LNLMF GHPQF TAVNH  
121 FIRLL QDEGR LREK TQNIID GLEKA AGVSP ELIWE AHGSP  
161 AAAAC IECIT PFSIE QNYLE AMSGT VSRCS TCGGI VKPNV  
201 VFFGE NLFDA FFDAL HHDAP IAEVL IITGT SMQVH PFALL  
241 PCVVF KSVPR VVNHK ERVGG LLFRF DDQPL NVVHE DAVAK  
281 EGRSS SGRSR SPSAS FRRSE GDTED SPSSE NEEVE EASTS  
321 SSSDG YQGYG DYHAM DVQCR DVLFK GDCQE NVVTL AYLIG  
361 LREAL AKRMR LQDAA PATAQ RAINE T
