# Supplementary material for: The crystal structure of the Leishmania infantum Silent Information Regulator 2 related protein 1: Implications to protein function and drug design
Source: PubMed Central journal article supplement (PMC5854310; doi:10.1371/journal.pone.0193602), 2018-03-15
Supplement: pone.0193602.s011.pdf [file pone.0193602.s011.pdf]

# DisEMBL™

## Prediction results for Q8I6E4\_LEIIN

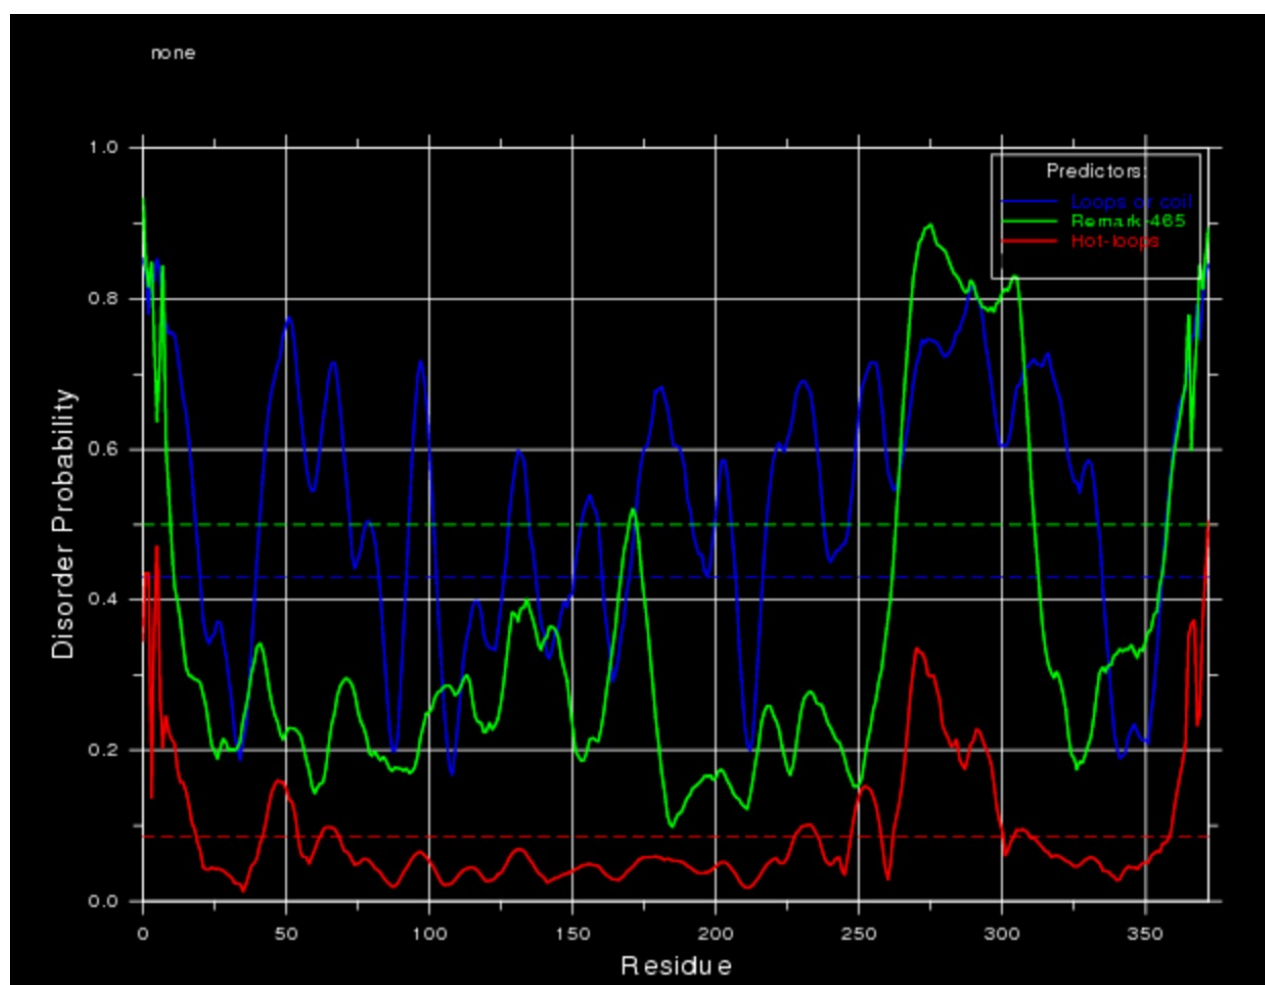

[Download PostScript file](#)

### Disordered by Loops/coils definition

```
> Q8I6E4_LEIIN_LOOPS 1-20, 41-83, 94-103, 128-138, 152-161, 171-207, 218-335, 357-373
MTASPRAPHQ EHLVGEPTLE glahyirekn vrrilvlvga GASVAAGIPD FRSPDTGIYA NLGKYNLEDP TDAFSLTLR
EKPeifysia relNLWPGHF QPTavhhfir llqdegrllr cctqnidGLE KAAGVSPELL veahgsfaaa aCIECHTPFS
Ieqnyleams GTVSR CSTCG GIVKPNVFF GENLPDAFFD ALHHDAPiae lviiigtSMQ VHPFALLPCV VPKSVPRVVM
NRERVGGLLF RFPDDPLNTV HEDAVAKEGR SSSSQSRSPS ASPRREEGGT EDPSPSPNEE VEEASTSSSS DGYGQYGDYH
AHPDVCRDVL FRGDCqenvv tlaeylglse alakrmRLSD AAPATAQRAP NET
```

### Disordered by Hot-loops definition

```
> Q8I6E4_LEIIN_HOTLOOPS 1-19, 44-55, 249-258, 263-301, 360-373
MTASPRAPHQ EHLVGEPTLe glahyirekn vrrilvlvga gasVAAGIPD FRSPDtgiya nlgkynledp tdafsltlr
ekpeifysia relnlwpghf qptavhhfir llqdegrllr cctqnidgle kaagvspell veahgsfaaa aciechtpfs
ieqnyleams gtvsrcstcg givkpnvff genlpdaffd alhhdapiae lviiigtsmq vhpfallpcv vpksvprvvm
nrervgglLF RFPDDPLNtv hedAVAKEGR SSSSQSRSPS ASPRREEGGT EDPSPSPNEE Veeastssss dgygqygdyh
ahpdvcrdvl frgdcqenvv tlaeylglse alakrmrlsD AAPATAQRAP NET
```

## Disordered by Remark-465 definition

> Q8I6E4\_LEIIN\_REM465 1-10, 264-312, 359-373

MTASPRAPHQ ehvlgeptle glahyirekn vrrilvlvga gasvaagipd frspdtgiya nlgkynledp tdaflstllr  
ekpeifysia relnlwpgfh qptavhhfir llqdegrllr cctqnidgle kaagvspell veahgsfaaa aciechtpfs  
ieqnyleams gtvsrctcg givkpnvfff genlpdaffd alhhdapiae lviiigtsmq vhpfallpcv vpksvprvmm  
nrervgllf rfpddplntv hed**AVAKEGR SSSSQSRSPS ASPRREEGGT EDPSSPNEE VEEASTSSSS DGygygydyh**  
ahpdvcrdvl frgdcqenvv tlaeylglse alakrmr1SD AAPATAQRAP NET

---

|                             |                                                            |
|-----------------------------|------------------------------------------------------------|
| <b>JOB-ID</b>               | Q8I6E4_LEIIN_164640WgSGcAoLCBIAAH45I88AAAAB                |
| <b>Frames used</b>          | smooth=8 peak=8 join=4                                     |
| <b>Thresholds used</b>      | coils=0.516 rem465=0.6 hot loops=0.1204                    |
| <b>Name</b>                 | Q8I6E4_LEIIN                                               |
| <b>Description</b>          | none                                                       |
| <b>Title/ID</b>             | none                                                       |
| <b>Sequence length</b>      | 373                                                        |
| <b>Download predictions</b> | <a href="#">smoothed scores</a> <a href="#">raw scores</a> |

---

DisEMBL™ is Copyright © 2003-2006 by [Rune Linding](#) & [Lars Juhl Jensen](#) - [EMBL](#)
