# Supplementary material for: The crystal structure of the Leishmania infantum Silent Information Regulator 2 related protein 1: Implications to protein function and drug design
Source: PubMed Central journal article supplement (PMC5854310; doi:10.1371/journal.pone.0193602), 2018-03-15
Supplement: pone.0193602.s012.pdf [file pone.0193602.s012.pdf]

# DISPHOS Results

> LiSIR2rp1

MTASPRAPHQEHVLGEP<sup>T</sup>LEGLAH<sup>Y</sup>IREKNVRRILVLVGAGASVAAGIPDFR<sup>S</sup>PD<sup>T</sup>GI<sup>Y</sup>ANLGK<sup>Y</sup>N  
 LEDP<sup>T</sup>DAF<sup>S</sup>L<sup>T</sup>LLREKPEIF<sup>Y</sup>S<sup>I</sup>ARELN<sup>L</sup>WPGHFQ<sup>P</sup>TAVHHFIRLLQDEGRLLRCCT<sup>Q</sup>NI<sup>D</sup>GLEKA  
 AGV<sup>S</sup>PELLVEAHGSFAAAACIECH<sup>T</sup>PF<sup>S</sup>IEQ<sup>N</sup>YLEAM<sup>S</sup>G<sup>T</sup>V<sup>S</sup>RC<sup>S</sup>T<sup>C</sup>GGIVKPNVFFGENLPDAF  
 FDALHHDAPIAELV<sup>I</sup>IIG<sup>T</sup>SMQVHPFALLPCVVPK<sup>S</sup>VPRVVMNRERVGGLLFRFPDDPLN<sup>T</sup>VHEDA  
 VAKEGR<sup>S</sup>S<sup>S</sup>S<sup>S</sup>Q<sup>S</sup>R<sup>S</sup>P<sup>S</sup>A<sup>S</sup>PRREEGG<sup>T</sup>ED<sup>S</sup>P<sup>S</sup>S<sup>S</sup>PNEEVEEA<sup>S</sup>T<sup>S</sup>S<sup>S</sup>S<sup>S</sup>DG<sup>Y</sup>G<sup>Q</sup>Y<sup>G</sup>D<sup>Y</sup>HAHPDVCRDVL<sup>F</sup>  
 RGDCQENVV<sup>T</sup>LAE<sup>Y</sup>LGL<sup>S</sup>EALAKRMRL<sup>S</sup>DAAPATAQRAPNET

## results

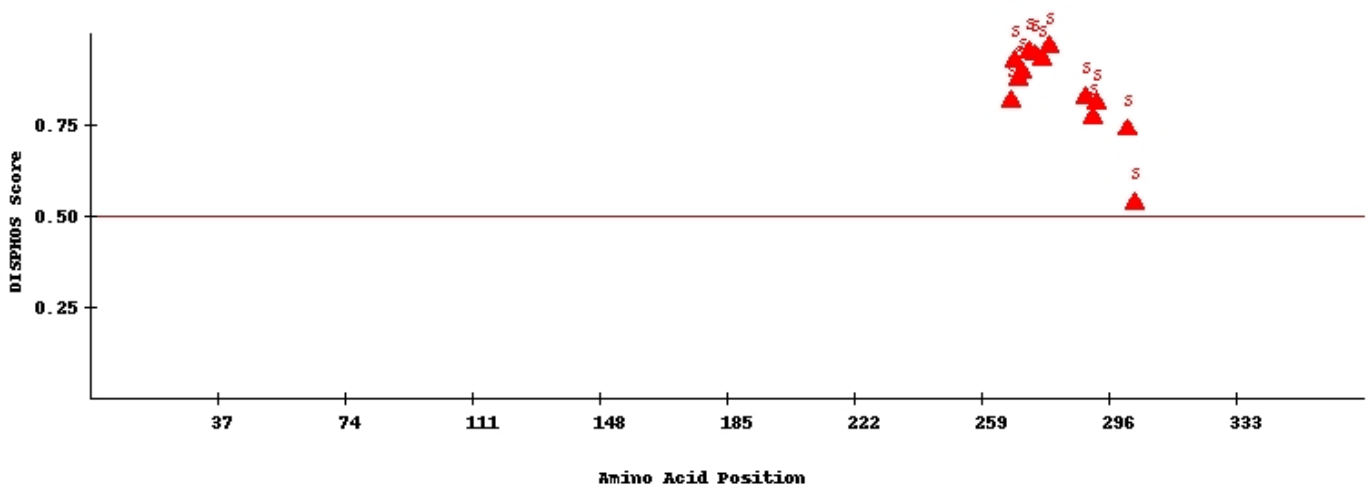

## Statistics

Number of phosphorylated serines: 13 out of 31 (41.935%)  
 Number of phosphorylated threonines: 0 out of 17 (0.000%)  
 Number of phosphorylated tyrosines: 0 out of 9 (0.000%)

| Position | Residue | Score | Sequence                            | Yes/No |
|----------|---------|-------|-------------------------------------|--------|
| 2        | T       | 0.095 | ***MTASPR                           |        |
| 4        | S       | 0.180 | *MTASPRAP                           |        |
| 18       | T       | 0.036 | LGEPTLEGL                           |        |
| 25       | Y       | 0.041 | GLAHYIREK                           |        |
| 43       | S       | 0.051 | GAGASVAAG                           |        |
| 53       | S       | 0.091 | PDFRSPDTG                           |        |
| 56       | T       | 0.023 | RSPDTGIYA                           |        |
| 59       | Y       | 0.128 | DTGIYANLG                           |        |
| 65       | Y       | 0.044 | NLGKYNLED                           |        |
| 71       | T       | 0.017 | LEDP <sup>T</sup> DAFS              |        |
| 75       | S       | 0.059 | TDAF <sup>S</sup> L <sup>T</sup> LL |        |
| 77       | T       | 0.005 | AFSL <sup>T</sup> LLRE              |        |

|     |   |       |                     |     |
|-----|---|-------|---------------------|-----|
| 87  | Y | 0.029 | PEIF <b>Y</b> SIAR  |     |
| 88  | S | 0.081 | EIFY <b>S</b> IARE  |     |
| 103 | T | 0.027 | HFQP <b>T</b> AVHH  |     |
| 123 | T | 0.005 | LRCC <b>T</b> QNIID |     |
| 136 | S | 0.100 | AAGV <b>S</b> PELL  |     |
| 146 | S | 0.073 | EAHG <b>S</b> FAAA  |     |
| 157 | T | 0.014 | IECH <b>T</b> PFSI  |     |
| 160 | S | 0.026 | HTPF <b>S</b> IEQN  |     |
| 165 | Y | 0.024 | IEQN <b>Y</b> LEAM  |     |
| 170 | S | 0.052 | LEAM <b>S</b> GTVS  |     |
| 172 | T | 0.005 | AMSG <b>T</b> VSRC  |     |
| 174 | S | 0.034 | SGTV <b>S</b> RCST  |     |
| 177 | S | 0.030 | VSRC <b>S</b> TCGG  |     |
| 178 | T | 0.020 | SRC <b>S</b> TCGGI  |     |
| 217 | T | 0.003 | IIIG <b>T</b> SMQV  |     |
| 218 | S | 0.008 | IIGT <b>S</b> MQVH  |     |
| 234 | S | 0.102 | VVPK <b>S</b> VPRV  |     |
| 259 | T | 0.114 | DPLN <b>T</b> VHED  |     |
| 271 | S | 0.821 | KEGR <b>S</b> SSSQ  | YES |
| 272 | S | 0.932 | EGR <b>S</b> SSSQS  | YES |
| 273 | S | 0.878 | GR <b>S</b> SSQSR   | YES |
| 274 | S | 0.899 | R <b>S</b> SSQSR    | YES |
| 276 | S | 0.955 | SS <b>S</b> QSRSPS  | YES |
| 278 | S | 0.947 | SQ <b>S</b> RSPSAS  | YES |
| 280 | S | 0.934 | SR <b>S</b> PASPR   | YES |
| 282 | S | 0.969 | SP <b>S</b> APRRE   | YES |
| 290 | T | 0.294 | EEGG <b>T</b> EDSP  |     |
| 293 | S | 0.831 | GTED <b>S</b> PSSP  | YES |
| 295 | S | 0.774 | ED <b>S</b> PS      | YES |
| 296 | S | 0.814 | DS <b>S</b> PNEE    | YES |
| 305 | S | 0.742 | VEEA <b>S</b> TSSS  | YES |
| 306 | T | 0.065 | EEA <b>S</b> TSSSS  |     |
| 307 | S | 0.541 | EAS <b>S</b> TSSSD  | YES |
| 308 | S | 0.480 | AST <b>S</b> SSDG   |     |
| 309 | S | 0.481 | ST <b>S</b> SSDGY   |     |
| 310 | S | 0.346 | TSS <b>S</b> SDGYG  |     |

|     |   |       |           |
|-----|---|-------|-----------|
| 313 | Y | 0.483 | SSDGYGQYG |
| 316 | Y | 0.216 | GYGQYGDYH |
| 319 | Y | 0.165 | QYGDYHAHP |
| 341 | T | 0.004 | ENVVTLAEY |
| 345 | Y | 0.031 | TLAEYLGLS |
| 349 | S | 0.109 | YLGLSEALA |
| 359 | S | 0.389 | RMRLSDAAP |
| 365 | T | 0.279 | AAPATAQRA |
| 373 | T | 0.051 | APNET**** |

\*An asterisk indicates prediction by similarity to the training sequences
